# Supplementary material for: A Novel Physical Fatigue Assessment Method Utilizing Heart Rate Variability and Pulse Arrival Time towards Personalized Feedback with Wearable Sensors
Source: MDPI journal article supplement (doi:10.3390/s22041680), 2022-02-21
Supplement: s1 [file s1]

|              |                                                                               | nothing to maximal |   |   |   |   |   |   |
|--------------|-------------------------------------------------------------------------------|--------------------|---|---|---|---|---|---|
|              |                                                                               | 0                  | 1 | 2 | 3 | 4 | 5 | 6 |
| 1.           | Physical exertion<br>(palpitations, sweaty, out of breath, breathing heavily) |                    |   |   |   |   |   |   |
| 2.           | Physical discomfort<br>(tense muscles, numbness, stiff join, aching)          |                    |   |   |   |   |   |   |
| 3.           | Lack of motivation<br>(lack of concern, passive, indifferent, uninterested)   |                    |   |   |   |   |   |   |
| 4.           | Sleepiness<br>(falling asleep, drowsy, yawning, sleepy)                       |                    |   |   |   |   |   |   |
| 5.           | Lack of energy<br>(worn out, spent, drained, overworked)                      |                    |   |   |   |   |   |   |
| Total Score: |                                                                               |                    |   |   |   |   |   |   |

**Figure S1.** The Swedish Occupational Fatigue Inventory questionnaire [19], which was used to evaluate subjective current fatigue levels of the participants.
